# Supplementary material
Source: publisher figshare collection journal article supplement (https://gsapubs.figshare.com/ndownloader/files/25538816)
Supplement: Supplementary file 1 [file 25538816]

## Supporting information for:

# Efficiency of eclogite removal from continental lithosphere and its implications for cratonic diamonds

**Yantao Luo<sup>1</sup> and Jun Korenaga<sup>1</sup>**

*<sup>1</sup>The Department of Earth and Planetary Sciences, Yale University, PO Box 208109, New Haven, Connecticut 06520-8109, USA. Email addresses: [yantao.luo@yale.edu](mailto:yantao.luo@yale.edu) and [jun.korenaga@yale.edu](mailto:jun.korenaga@yale.edu)*

### Contents of this file:

Model parameters

Figure S1 to S3

## 1. MODEL PARAMETERS

### Temperature dependent thermal conductivities

Crust (Whittington et al., 2009):

$$k(T < 846K) = 2700 * \frac{199.5 + 0.0857 * T - 5 * 10^6 * T^{-2}}{0.21178} * \frac{(567.3 * T^{-1} - 0.062)}{10^6}$$

$$k(T > 846K) = 2700 * \frac{229.32 + 0.0323 * T - 47.9 * 10^{-6} * T^2}{0.22178} * \frac{(0.732 - 1.35 * 10^{-4} * T)}{10^6}$$

Mantle (McKenzie et al., 2005):

$$k(T) = \frac{5.3}{1 + 0.0015 * (T - 273)} + 1.753 * 10^{-2} - 1.0365 * 10^{-4} * T + 2.2451 * 10^{-7} * T^2 - 3.4071 * 10^{-11} * T^3$$

### Radiogenic heat production in cratons (calculated based on Rudnick et al., 1998)

|                        | $^{235}\text{U}$<br>(ppm) | $^{238}\text{U}$<br>(ppm) | $^{232}\text{Th}$<br>(ppm) | $^{40}\text{K}$<br>(ppm) | Present Heat Production<br>( $\mu\text{W m}^{-3}$ ) |
|------------------------|---------------------------|---------------------------|----------------------------|--------------------------|-----------------------------------------------------|
| Bulk continental crust | $4.9 \times 10^{-3}$      | 0.70                      | 3.0                        | 1.2                      | 0.51                                                |
| Lithospheric mantle    | $2.6 \times 10^{-4}$      | 0.037                     | 0.14                       | 0.043                    | 0.028                                               |

The continental crust is divided into upper, middle, and lower one thirds, with 60%, 34%, and 6% of total crust heat production, respectively.

### Dislocation creep constants (Jain et al., 2019)

Model OL-DB<sub>2</sub> for dry diffusion and dry dislocation is used.

For diffusion,  $p = 2.11 \pm 0.15$ ,  $E = 370 \pm 15$  kJ/mol,  $A = 10^{7.86 \pm 0.15}$ .

For dislocation,  $n = 3.64 \pm 0.99$ ,  $E = 424 \pm 23$  kJ/mol,  $A = 10^{2.10 \pm 0.20}$ .

The mean value is used for each parameter. Preexponential factors  $A$  listed above are calibrated at 1523 K and 0.3 GPa with activation volume  $V = 0$ . We recalibrated the preexponential factor for every activation volume tested in this study as follows:

|                       | $A_{diffusion}$ | $A_{dislocation}$ |
|-----------------------|-----------------|-------------------|
| $V = 10 \text{ cm}^3$ | $10^{7.78}$     | $10^{2.20}$       |
| $V = 20 \text{ cm}^3$ | $10^{7.89}$     | $10^{2.31}$       |
| $V = 30 \text{ cm}^3$ | $10^{7.99}$     | $10^{2.41}$       |

## 2. SUPPORTING FIGURES

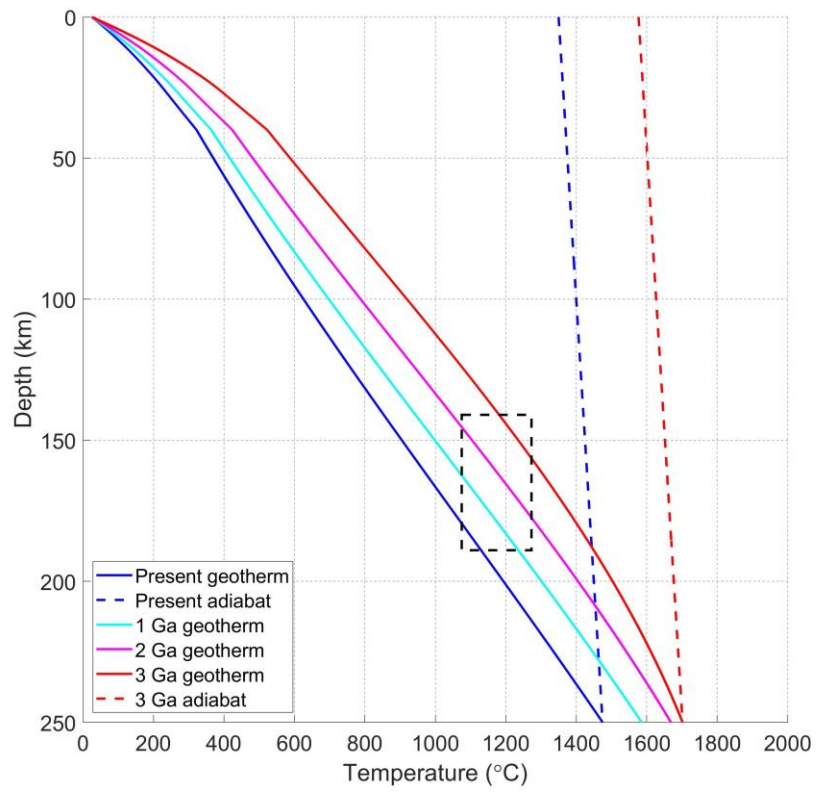

**Figure S1.** Calculated current, 1 Ga, 2 Ga, and 3 Ga geotherms are plotted with current and 3 Ga adiabat lines. Dashed rectangle represents the constraints from the geothermometry of cratonic diamonds,  $1174 \pm 99$  °C at  $55 \pm 8$  kbar (Stachel and Harris, 2008).

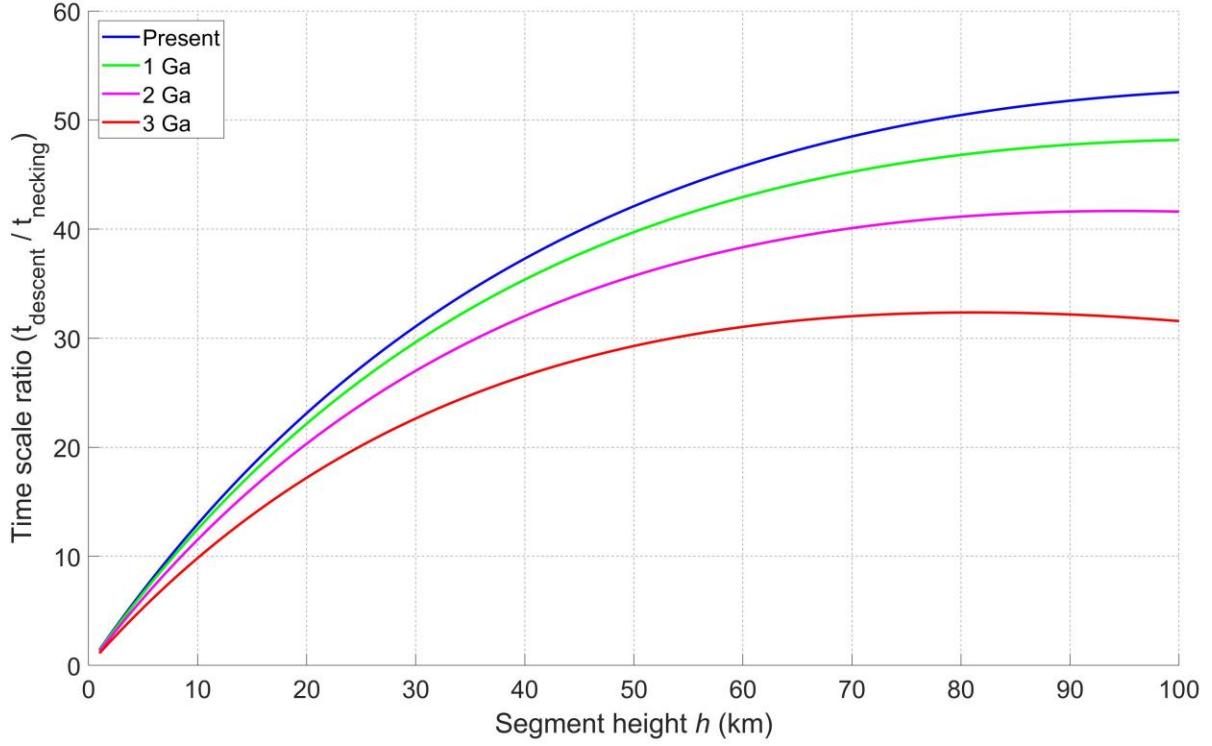

**Figure S2.** The ratio of the time scale for a segment to descend over the time scale for the growth of necking instability is plotted as a function of segment height  $h$ . The descent time scale is based on eq. (8) in the main text. The time scale for necking instability is estimated as  $t = ((n - 1) * \dot{\epsilon})^{-1}$  based on eq. (6) in Zuber and Parmentier (1986).  $\dot{\epsilon}$  is the strain rate generated by differential velocity, and  $n$  is the stress exponent of the material, where we use  $n = 3.5$  for eclogite (Zhang and Green, 2007). Necking instability grows exponentially from infinitesimal perturbations, and segmentation would take place when the ratio  $\gg 1$ .

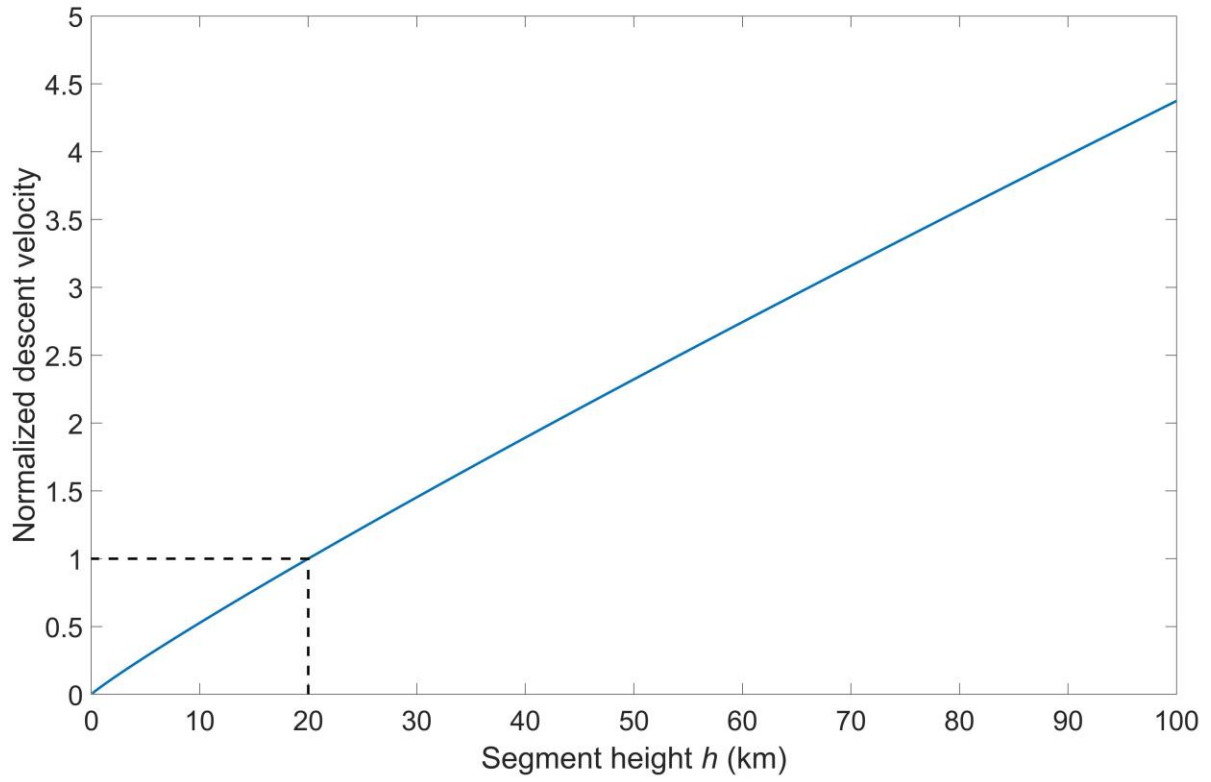

**Figure S3.** Descent velocities calculated with a range of segment heights are normalized regarding to the result of 20 km height, with other parameters fixed at  $L = 2500$  km,  $w = 7$  km,  $\eta = 2 * 10^{30}$  N·m, and  $\Delta\rho = 200$  g/cm<sup>3</sup>.

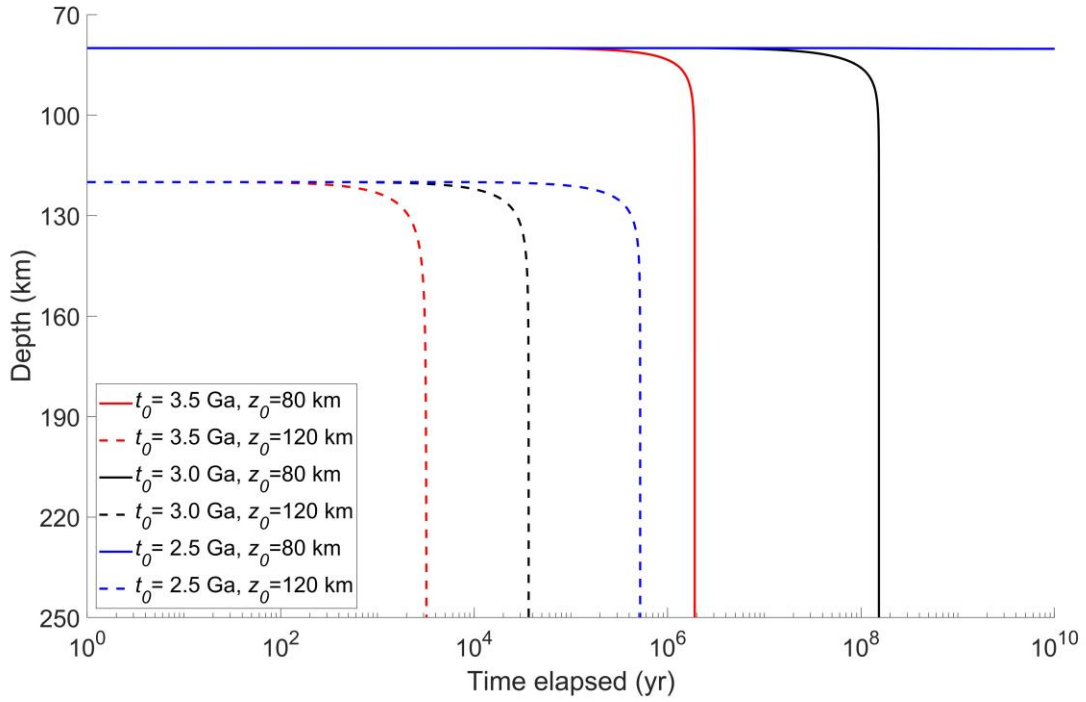

**Figure S4.** The depth of oceanic crust fragments with different incorporation ages and starting depths is plotted as a function of the time elapsed after incorporated into CLM. An activation volume  $V$  of  $20 \text{ cm}^3/\text{mol}$  for the dislocation creep regime and a segment height  $h$  of 20 km are used for this plot. Each of the curves in this plot corresponds to a point in Figure 3, and the time elapsed until the crust fragments descend to 250 km is the escape time shown in Figure 3.

## REFERENCES CITED

- Jain, C., Korenaga, J., and Karato, S. i., 2019, Global analysis of experimental data on the rheology of olivine aggregates: *Journal of Geophysical Research: Solid Earth*, v. 124, no. 1, p. 310-334.
- McKenzie, D., Jackson, J., and Priestley, K., 2005, Thermal structure of oceanic and continental lithosphere: *Earth and Planetary Science Letters*, v. 233, no. 3, p. 337-349, <https://doi.org/10.1016/j.epsl.2005.02.005>.
- Rudnick, R. L., McDonough, W. F., and O'Connell, R. J., 1998, Thermal structure, thickness and composition of continental lithosphere: *Chemical Geology*, v. 145, no. 3, p. 395-411, [https://doi.org/10.1016/S0009-2541\(97\)00151-4](https://doi.org/10.1016/S0009-2541(97)00151-4).
- Stachel, T., and Harris, J. W., 2008, The origin of cratonic diamonds — Constraints from mineral inclusions: *Ore Geology Reviews*, v. 34, no. 1, p. 5-32, <https://doi.org/10.1016/j.oregeorev.2007.05.002>.
- Whittington, A. G., Hofmeister, A. M., and Nabelek, P. I., 2009, Temperature-dependent thermal diffusivity of the Earth's crust and implications for magmatism: *Nature*, v. 458, no. 7236, p. 319-321, 10.1038/nature07818.
- Zhang, J., and Green, H. W., 2007, Experimental Investigation of Eclogite Rheology and Its Fabrics at High Temperature and Pressure: *Journal of Metamorphic Geology*, v. 25, no. 2, p. 97-115, 10.1111/j.1525-1314.2006.00684.x.
- Zuber, M. T., and Parmentier, E. M., 1986, Lithospheric necking: a dynamic model for rift morphology: *Earth and Planetary Science Letters*, v. 77, no. 3, p. 373-383, [https://doi.org/10.1016/0012-821X\(86\)90147-0](https://doi.org/10.1016/0012-821X(86)90147-0).
